# Supplementary material for: Reasons for Adding Different Tastes: An Example of Sprinkling Salt on Watermelon and Its Relation to Subjective Taste Perception, Taste Preference, and Autistic Traits
Source: Hindawi journal article supplement (doi:10.1155/2023/9945339), 2023-02-13
Supplement: f1 [file 9945339.f1.zip]

Archive with 3 entries (3 files):
- Supplementary material-Online questionnaire survey.docx
- Supplementary material-Table S1.docx
- Supplementary material-Table S2.docx
