# Supplementary material for: Reasons for Adding Different Tastes: An Example of Sprinkling Salt on Watermelon and Its Relation to Subjective Taste Perception, Taste Preference, and Autistic Traits
Source: Hindawi journal article supplement (doi:10.1155/2023/9945339), 2023-02-13
Supplement: f1 [file 9945339.f1.zip › Supplementary material-Online questionnaire survey.docx]

**Online questionnaire survey**

Welcome to the online questionnaire survey. This study aims to understand the food difficulties faced by people with developmental disabilities, to develop better solutions for solving the unbalanced food behavior problems. The results of this survey will be published as conference presentations, academic papers, and databases, and may also be used as publicity and educational materials. Since this is an anonymous survey, please do not write anything related to personal information (name, address, etc.) in the free text field. For more details about this study, please refer to the link of "Instruction for Research Participants”. If you are under 20 years old, please obtain the consent of your parent or guardian before filling out this form.

Thank you very much for your time.

What is your age range?

○ 15~19

○ 20~29

○ 30~39

○ 40~49

○ 50~59

○ 60~

What is your gender?

○ Male

○ Female

○ Others/prefer not to answer

Have you ever been diagnosed with a developmental disability or other neuropsychiatric disorder? Please select all that apply (multiple answers are possible).

○ No diagnosis (generally neurotypical)

○ Autism spectrum disorders (autism/ Asberger syndrome/ pervasive developmental disorder)

○ Attention deficit hyperactivity disorder

○ Learning disabilities

○ Intellectual disability

○ Other neuropsychiatric disorders / disorders

○ Unknown (including undiagnosed / suspected)

If you selected "unknown (including undiagnosed or suspected)" for "other neuropsychiatric diseases/disorders" in the previous question, please provide the specific name of the diagnosis (including the judgment by the public institution).

What is your hometown?

○ Hokkaido

○ Tohoku

○ Kanto

○ Chubu

○ Kinki

○ Chukoku

○ Shikoku

○ Kunsho/Okinawa

○ Outside of Japan

**Session 1: Basic taste preference.**

In this session, please rate how much you like each of the basic tastes by the five point-Likert scale.

[I don’t like it at all] ○1 ○2 ○3 ○4 ○5 [I like it very much]

1. How much you like the salty taste.

2. How much you like the sweet taste.

3. How much you like the bitter taste.

4. How much you like the sour taste.

5. How much you like the umami taste.

**Session 2: Taste perception**

In this session, the taste perception of taste lasting, detection speed, sensitivity, and identity will be investigated. Please rate the degree to which the content of each item fit your condition: 1[strongly disagree] to 5 [strongly agree].

Strongly disagree ○1 ○2 ○3 ○4 ○5 Strongly agree

1. Salty taste seems lasting a long time in the mouth.

2. Sour taste seems lasting a long time in the mouth.

3. Sweet taste seems lasting a long time in the mouth.

4. Bitter taste seems lasting a long time in the mouth.

5. Umami taste seems lasting a long time in the mouth.

6. Salty taste can be felt the moment it enters the mouth.

7. Sour taste can be felt the moment it enters the mouth.

8. Sweet taste can be felt the moment it enters the mouth.

9. Bitter taste can be felt the moment it enters the mouth.

10. Umami taste can be felt the moment it enters the mouth.

11. Salty taste can be felt even if it is very thin.

12. Sour taste can be felt even if it is very thin.

13. Sweet taste can be felt even if it is very thin.

14. Bitter taste can be felt even if it is very thin.

15.Umami taste can be felt even if it is very thin.

16. Salty taste can be easily identified even if it is mixed in various tastes.

17. Sour taste can be easily identified even if it is mixed in various tastes.

18. Sweet taste can be easily identified even if it is mixed in various tastes.

19. Bitter taste can be easily identified even if it is mixed in various tastes.

20. Umami taste can be easily identified even if it is mixed in various tastes.

**Session 3: Watermelon with salt experience**

In this session, two questions on the way of eating watermelon will be investigated.

1. Have you ever eaten watermelon with salt sprinkled on it?

○ Yes ○ No

2. How delicious do you think watermelon tastes when you sprinkle salt on it?

Not delicious at all ○1 ○2 ○3 ○4 ○5 Very delicious

**Session 4: Autistic traits**

For each statement below, choose one response that best describes how strongly that statement applies to you:

○Definitely Agree ○Slightly Agree ○Slightly Disagree ○Definitely Disagree

1. I prefer to do things with others rather than on my own.
2. Other people frequently tell me that what I’ve said is impolite, even though I think it is polite.
3. I tend to have very strong interests, which I get upset about if I can’t pursue.
4. When I’m reading a story, I find it difficult to work out the characters’ intentions.
5. I would rather go to the theater than to a museum.
6. I am often the last to understand the point of a joke.
7. I find it easy to work out what someone is thinking or feeling just by looking at their face.
8. I like to collect information about categories of things (e.g., types of cars, birds, trains, plants).
9. I find it difficult to imagine what it would be like to be someone else.

I find it difficult to work out p
