# Supplementary material for: Reasons for Adding Different Tastes: An Example of Sprinkling Salt on Watermelon and Its Relation to Subjective Taste Perception, Taste Preference, and Autistic Traits
Source: Hindawi journal article supplement (doi:10.1155/2023/9945339), 2023-02-13
Supplement: f1 [file 9945339.f1.zip › Supplementary material-Table S1.docx]

Table S1. Results of ﻿univariate analysis of covariance on the effect of AQ group on subjective taste perceptions

| Perception | Taste | *F* | *p-value* | ηp2 |
| --- | --- | --- | --- | --- |
| Lasting | Salty | 0.04 | 0.97 | 0.00 |
| Sour | 3.50 | 0.03 | 0.06 |
| Sweet | 0.09 | 0.91 | 0.00 |
| Bitter | 1.37 | 0.26 | 0.02 |
| Umami | 0.28 | 0.75 | 0.00 |
| Speed | Salty | 2.17 | 0.12 | 0.04 |
| Sour | 0.07 | 0.93 | 0.00 |
| Sweet | 1.14 | 0.32 | 0.02 |
| Bitter | 0.65 | 0.52 | 0.01 |
| Umami | 0.39 | 0.68 | 0.01 |
| Detection | Salty | 0.64 | 0.53 | 0.01 |
| Sour | 0.04 | 0.96 | 0.00 |
| Sweet | 1.27 | 0.28 | 0.02 |
| Bitter | 0.74 | 0.48 | 0.01 |
| Umami | 2.25 | 0.11 | 0.04 |
| Identification | Salty | 2.06 | 0.13 | 0.03 |
| Sour | 1.17 | 0.31 | 0.02 |
| Sweet | 1.08 | 0.34 | 0.02 |
| Bitter | 0.50 | 0.61 | 0.01 |
| Umami | 1.15 | 0.32 | 0.02 |

*Note: df = 116; p-*values are before FDR correction for multiple testing.
