# Supplementary material for: Reasons for Adding Different Tastes: An Example of Sprinkling Salt on Watermelon and Its Relation to Subjective Taste Perception, Taste Preference, and Autistic Traits
Source: Hindawi journal article supplement (doi:10.1155/2023/9945339), 2023-02-13
Supplement: f1 [file 9945339.f1.zip › Supplementary material-Table S2.docx]

Table S2. Results of ﻿univariate analysis of covariance on the effect of AQ group on subjective taste preferences

|  | Taste | *F* | *p-value* | ηp2 |
| --- | --- | --- | --- | --- |
| Preference | Salty | 1.73 | 0.18 | 0.03 |
| Sour | 0.40 | 0.67 | 0.00 |
| Sweet | 1.23 | 0.30 | 0.02 |
| Bitter | 0.46 | 0.64 | 0.00 |
| Umami | 0.28 | 0.76 | 0.00 |

*Note: df = 116; p-*values are before FDR correction for multiple testing.
